# Supplementary material
Source: publisher figshare collection journal article supplement (https://brill.figshare.com/ndownloader/files/31559642)
Supplement: Supplementary file 1 [file 31559642]

## **Plant growth promoting potential of multifarious endophytic**

### ***Pseudomonas lini* strain isolated from *Cicer arietinum* L.**

Rajat Maheshwari\*, Namita Bhutani, Pradeep Kumar and Pooja Suneja

Department of Microbiology, Maharshi Dayanand University, Rohtak, 124001, Haryana, India

**CONTACT** Pooja Suneja [email] [poojapavit@gmail.com](mailto:poojapavit@gmail.com)

\* ORCID: 0000-0003-3051-9906

### **Supplementary material**

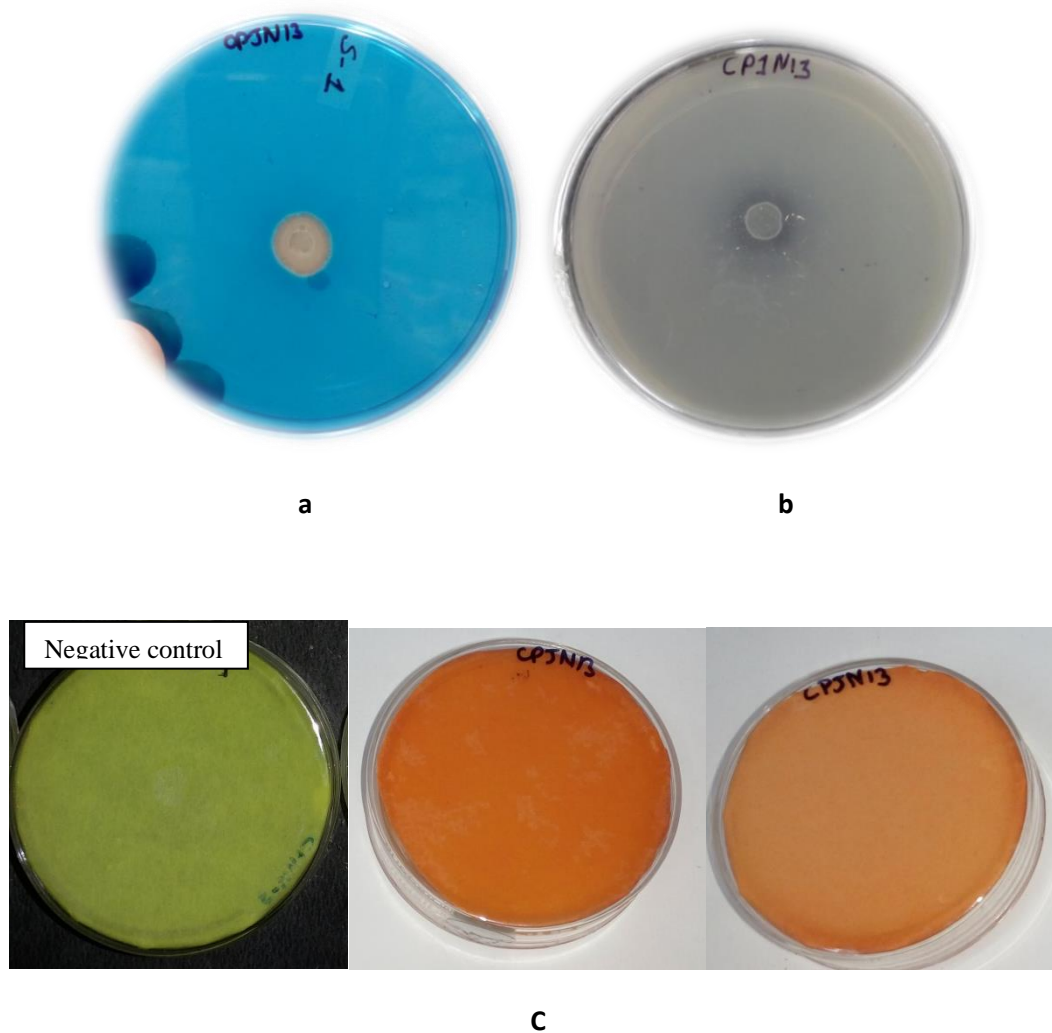

**Figure S1.** Plant growth promoting traits of the CPJN13 (a) Siderophore production, (b) Phosphate solubilization, (c) HCN production.

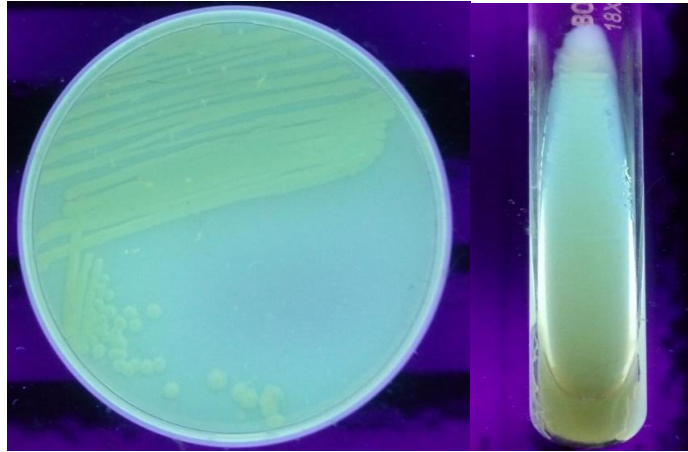

**Figure S2.** Yellow-green fluorescence produced under UV by the CPJN13 on King's B agar.
